# Supplementary material for: COVID-19 instigates adipose browning and atrophy through VEGF in small mammals
Source: PubMed Central journal article supplement (PMC9771808; doi:10.1038/s42255-022-00697-4), 2022-12-08

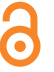

---

# COVID-19 instigates adipose browning and atrophy through VEGF in small mammals

---

In the format provided by the authors and unedited

**COVID-19 instigates adipose browning and atrophy  
through VEGF in small mammals**

|                              |                                  |
|------------------------------|----------------------------------|
| <b>Supplementary Table 1</b> | Clinical characteristics         |
| <b>Supplementary Table 2</b> | Primer sequences                 |
| <b>Supplementary Fig. 1</b>  | Raw data of gels for immunoblots |

**Supplementary Table 1.** Clinical characteristics

| <b>Groups</b>       | <b>Age (years)</b> | <b>Sex</b> | <b>BMI (kg/m<sup>2</sup>)</b> |
|---------------------|--------------------|------------|-------------------------------|
| <b>Non-infected</b> |                    |            |                               |
| Patient 1           | 69                 | Male       | 34.5                          |
| Patient 2           | 74                 | Male       | 35.5                          |
| Patient 3           | 75                 | Female     | 26.9                          |
| Patient 4           | 61                 | Female     | 24.9                          |
| <b>Covid-19</b>     |                    |            |                               |
| Patient 1           | 61                 | Male       | 27                            |
| Patient 2           | 55                 | Male       | 24.7                          |
| Patient 3           | 81                 | Female     | 26.9                          |
| Patient 4           | 57                 | Female     | 33.1                          |

**Supplementary Table 2. Primer sequences**

| Gene           | Species       | Forward primer sequence      | Reverse primer sequence       |
|----------------|---------------|------------------------------|-------------------------------|
| <i>Actin</i>   | mouse         | 5'-AGGCCAGAGCAAGAGAGG-3'     | 5'-TACATGGCTGGGGTGTGAA-3'     |
| <i>Ucp1</i>    | mouse         | 5'-AAACAGAAGGATTGCCGAAA-3'   | 5'-TGCATTCTGACCTTCACGAC-3'    |
| <i>Cox4</i>    | mouse         | 5'-CTATGTGTATGGCCCCATCC-3'   | 5'-AGCGGGCTCTCTCACTTCTTC-3'   |
| <i>Cox7a</i>   | mouse         | 5'-CAGCGTCATGGTCAGTCTGT-3'   | 5'-AGAAAACCGTGTGGCAGAGA-3'    |
| <i>Cox8b</i>   | mouse         | 5'-GAACCATGAAGCCAACGACT-3'   | 5'-GCGAAGTTCACAGTGGTTCC-3'    |
| <i>Cidea</i>   | mouse         | 5'-TGCTCTTCTGTATCGCCCAGT-3'  | 5'-TGCTCTTCTGTATCGCCCAGT-3'   |
| <i>Prdm16</i>  | mouse         | 5'-CAGCACGGTGAAGCCATTC-3'    | 5'-GCGTGCATCCGCTTGTG-3'       |
| <i>Car9</i>    | mouse/hamster | 5'-CTGAAGACAGGATGGAGAAG-3'   | 5'-GCAGAGTGCGGCAGAATG-3'      |
| <i>Hif1a</i>   | mouse/hamster | 5'-GTCGGACAGCCTCACCAAACAG-3' | 5'-TAGGTAGTGAGCCACCAGTGTCC-3' |
| <i>Vegf</i>    | mouse/hamster | 5'-ATCCGCATGATCTGCATGG-3'    | 5'-AGTCCCATGAAGTGATCAAGTCA-3' |
| <i>Actin</i>   | hamster       | 5'-AAGTGTGACGTCGACATCCG-3'   | 5'-GATCCACACAGAGTACTTGC-3'    |
| <i>Ucp1</i>    | hamster       | 5'-GAGCTGGTAACATATGACCT-3'   | 5'-TGTCCTGGCAGAGAGTTGAT-3'    |
| <i>Cox4</i>    | hamster       | 5'-AACAGGAGACCAATGAGTG-3'    | 5'-TTGGCCTTCATGTCCAGCAT-3'    |
| <i>Dio2</i>    | hamster       | 5'-TACGGGGTAGCTTTTGAGCG-3'   | 5'-CTCCGCACTTCTTGGAGGTT-3'    |
| <i>Tbx1</i>    | hamster       | 5'-GGCGGGCAGGCGGATGTTC-3'    | 5'-TGTCATCCACAGGCACAAAG-3'    |
| <i>Tnfrsf9</i> | hamster       | 5'-ATCTGCAGAGTGTGCGAAGG-3'   | 5'-TAACTCTTGACCCGGCTTGC-3'    |
| <i>Pdgfra</i>  | hamster       | 5'-GTGGGTATCGGATGGCCAAA-3'   | 5'-TTGTACTGTCCAGGCAGCAG-3'    |
| <i>ACTIN</i>   | human         | 5'-ATTGCCGACAGGATGCAGAA-3'   | 5'-GCTGATCCACATCTGCTGGAA-3'   |
| <i>UCP1</i>    | human         | 5'-CAACCCACAGAGGTCGTGAA-3'   | 5'-CCCGTGTAGCGAGGTTTGTGAT-3'  |
| <i>COX4</i>    | human         | 5'-CAGGGTATTTAGCCTAGTTGGC-3' | 5'-GCCGATCCATATAAGCTGGGA-3'   |
| <i>COX7a</i>   | human         | 5'-TTCACGCAGAAGTTGGCAGG-3'   | 5'-GAGGTCAGTTTGTGTTGGTGTG-3'  |

Supplementary Figure 1

Raw data of gels for immunoblots.

Whole gel images. Boxes imply area shown in the figure.

Full scans of immunoblots in Fig. 1f

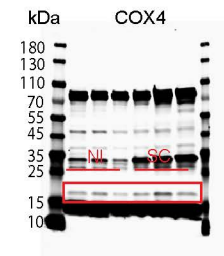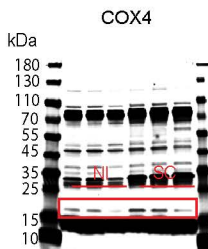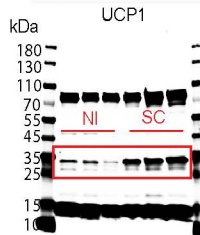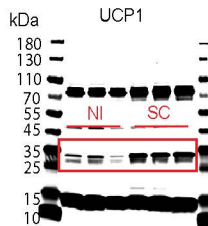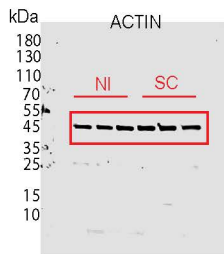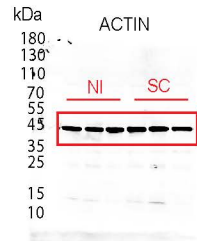

Full scans of immunoblots in Fig. 1h

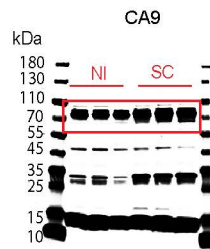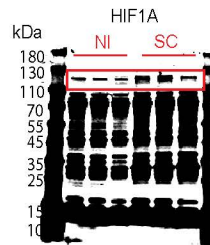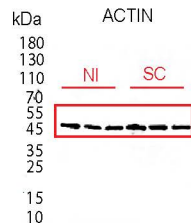

# Supplementary Figure 1

Raw data of gels for immunoblots.

Whole gel images. Boxes imply area shown in the figure.

Full scans of immunoblots in Extended Data Fig. 2a and 2c

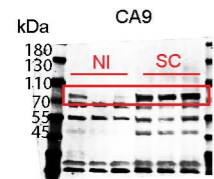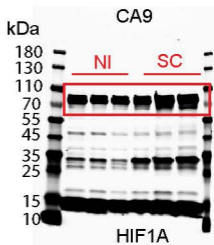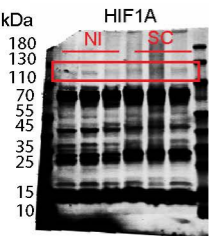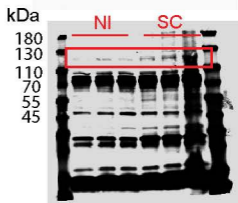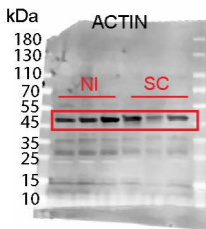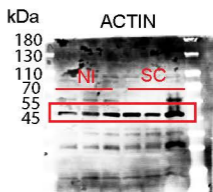

# Supplementary Figure 1

Raw data of gels for immunoblots.

Whole gel images. Boxes imply area shown in the figure.

Full scans of immunoblots in Extended Data Fig. 5c and 5d

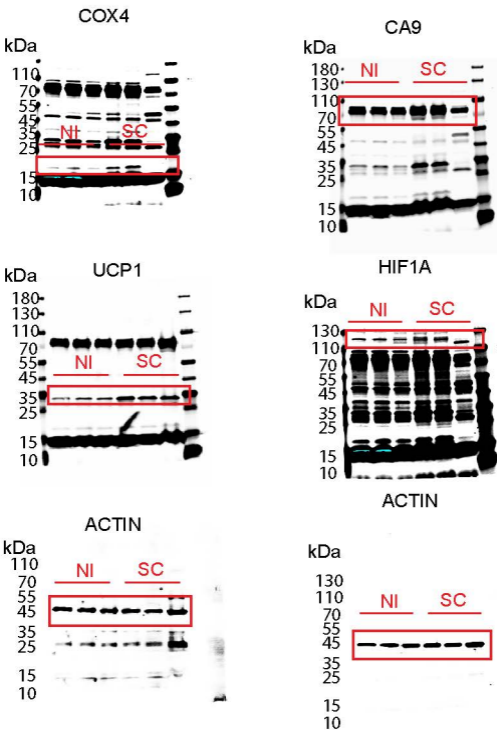

Supplement: 42255_2022_697_MOESM1_ESM.pdf [file 42255_2022_697_MOESM1_ESM.pdf]
